# Supplementary material
Source: PubMed Central journal article supplement (PMC2577729)

**Serum inter- $\alpha$ -trypsin inhibitor and matrix hyaluronan promote angiogenesis in fibrotic lung injury.**

Stavros Garantziotis, Enrique Zudaire, Carol S. Trempus, John W. Hollingsworth, Dianhua Jiang, Lisa H. Lancaster, Elizabeth Richardson, Lisheng Zhuo, Frank Cuttitta, Kevin K. Brown, Paul W. Noble, Koji Kimata, and David A. Schwartz.

**Online Data Supplement**

## **Supplemental Information**

### **Supplemental Figure E1**

Healon and sonicated Healon sizes. Healon was sonicated on ice for 5 repeats of 3 seconds each. Aliquots were run on 0.5% agarose gels together with hyaluronan size ladders (Associates of Cape Cod, East Falmouth, MA). Lane 1: High molecular weight hyaluronan ladder. Lane 2: low MW hyaluronan ladder. Lane 3: Healon. Lane 4: sonicated Healon.

### **Supplemental Figure E2**

Increased cellular inflammation in bikunin/lal-deficient mice. A. Seven days after intratracheal bleomycin exposure, bikunin/lal-deficient mice exhibit dense cellular inflammation. B. lal-sufficient littermates show comparatively less cellular inflammation (HE, 40x). N= 10-14 mice for each group. C. Lavage fluid cells after intratracheal bleomycin exposure. Bikunin/lal deficient mice show increased cells compared to sufficient mice at all timepoints. D. Lavage fluid hyaluronan after bleomycin exposure. Bikunin/lal deficient mice show increased levels compared to sufficient mice at 14 and 21 days (\* $p < 0.05$ ). N=10-14 mice for each group.

### **Supplemental Figure E3**

Immunohistochemistry for lal in different interstitial lung diseases. lal stains mostly within vessels and in the adventitia of vessels (arrows) in hypersensitivity pneumonitis (A), AIP (B), NSIP (C), and normal lung (F). lal is found in the periphery of sarcoidosis nodules (D, small arrows). lal is seen in the fibroblastic foci of a lung with UIP (E, arrowheads, two “kissing” fibroblastic foci). Magnification 40x-100x.

**Supplemental Figure E4**

Immunohistochemistry for ial in a fibroblastic focus, showing extracellular distribution of ial (Magnification 630x)

Supplemental Figure E1

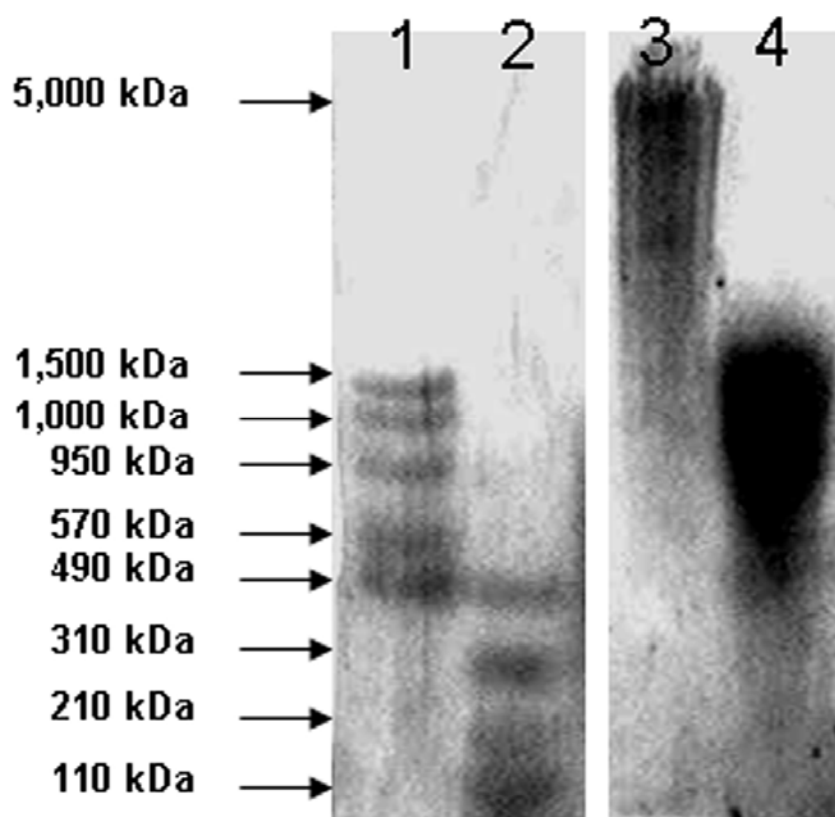

Supplemental Figure E2

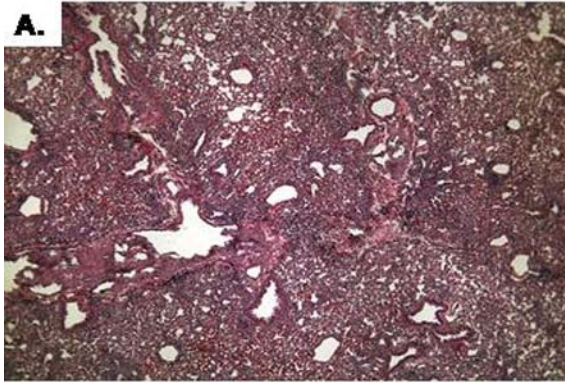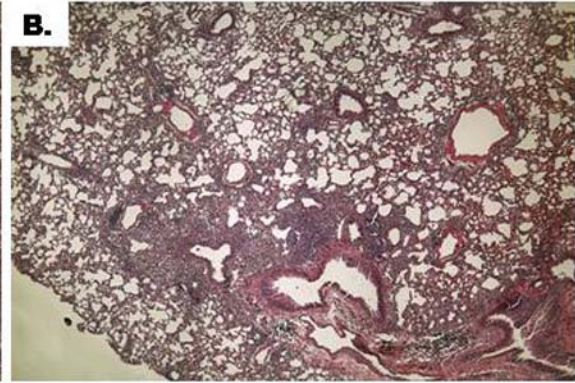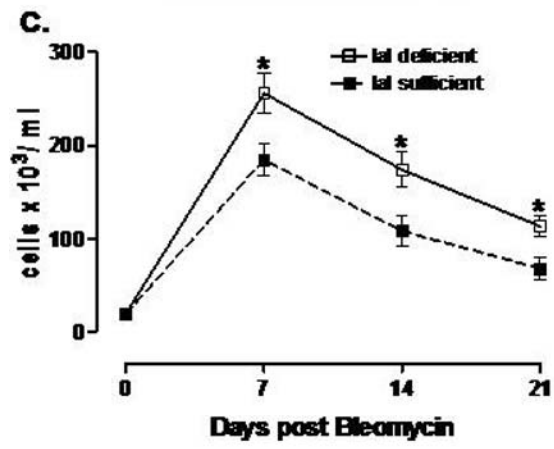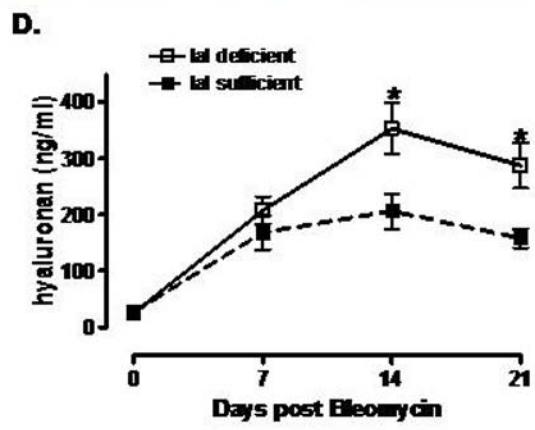

Supplemental Figure E3

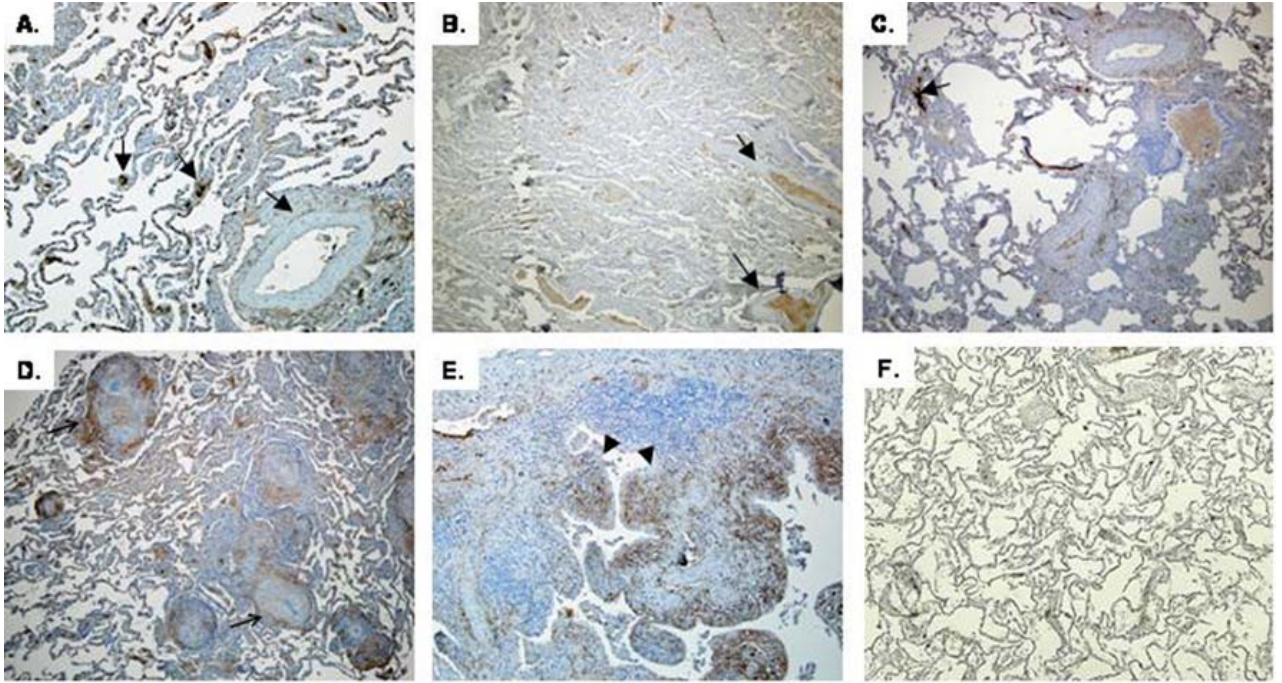



Supplemental Figure E4

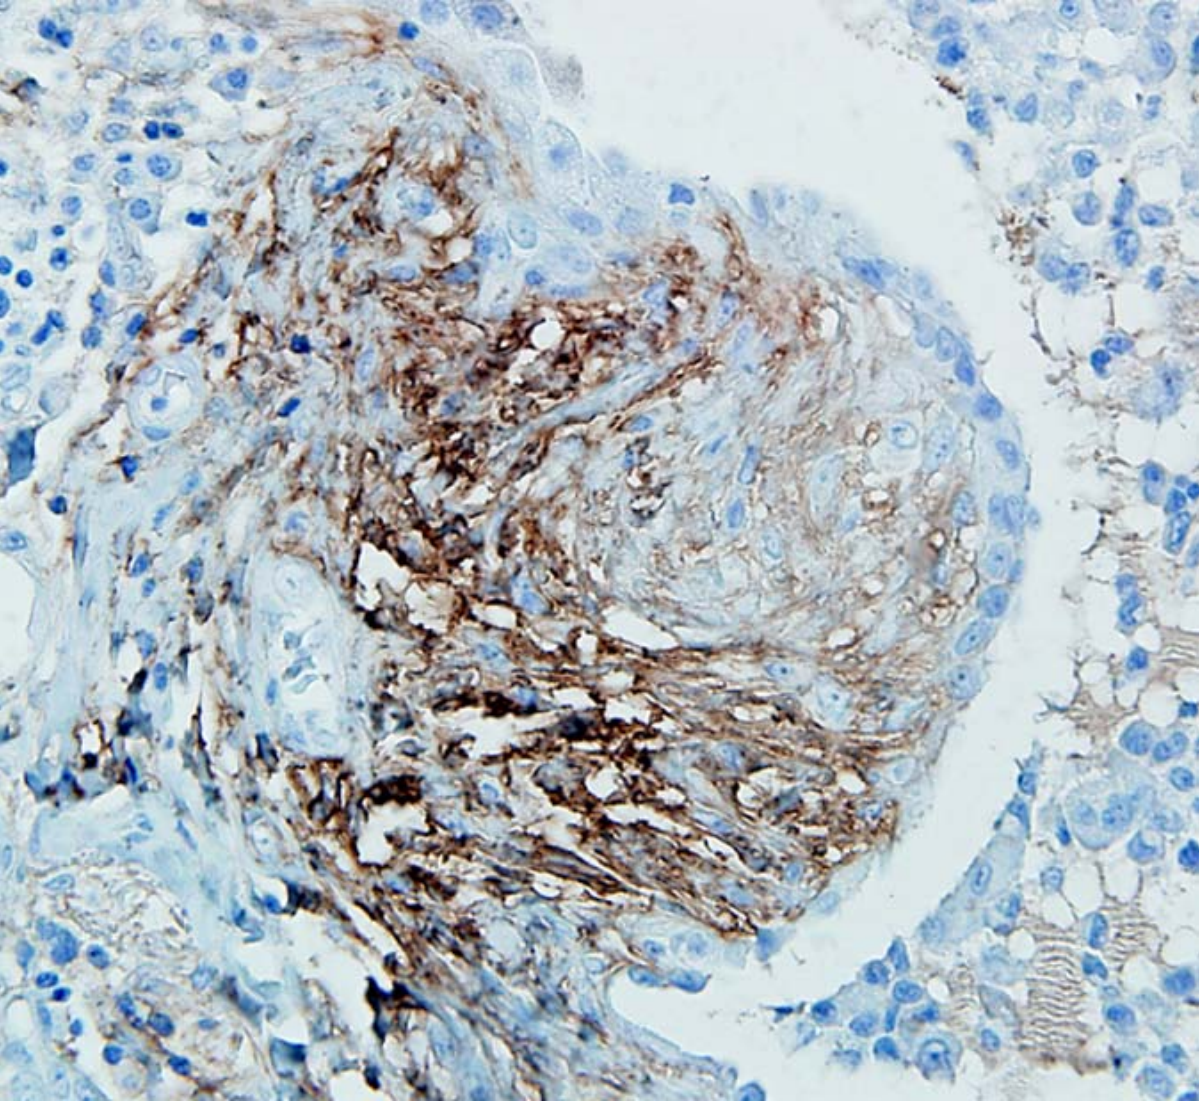

Supplement: supp_178_9_939__1.pdf [file supp_178_9_939__1.pdf]
